# Supplementary material for: Alterations in the Occipital Cortex of Drug-Naïve Adults With Major Depressive Disorder: A Surface-Based Analysis of Surface Area and Cortical Thickness
Source: PubMed Central journal article supplement — Psychiatry Investig. 2021 Oct 13;18(10):1025–33. doi: 10.30773/pi.2021.0099 (PMC8542746; doi:10.30773/pi.2021.0099), 2021-10-13
Supplement: pi-2021-0099-suppl.pdf [file pi-2021-0099-suppl.pdf]

**Supplementary Table 1.** Correlation between the cortical surface area and the cortical thickness among patients with drug-naïve major depressive disorder (MDD) and healthy controls (HC)

| Cortical region               | R      | p-value |
|-------------------------------|--------|---------|
| MDD                           |        |         |
| Left superior occipital gyrus | 0.277  | 0.023*  |
| HC                            |        |         |
| Left superior occipital gyrus | -0.271 | 0.005*  |

p<0.05. \*denotes significance
